# Supplementary material
Source: PubMed Central journal article supplement (PMC4152009)
Supplement: NIHMS597985-supplement-protective.pdf [file NIHMS597985-supplement-protective.pdf]

A

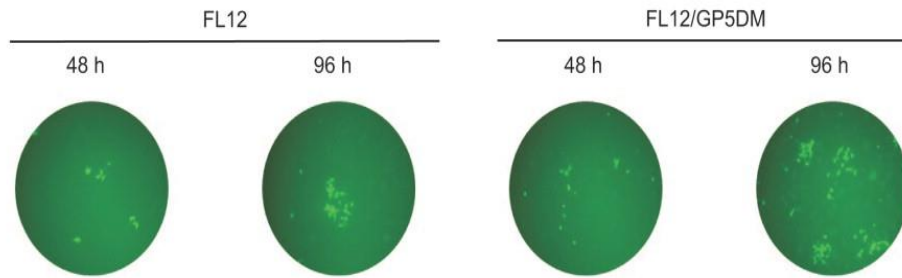

B

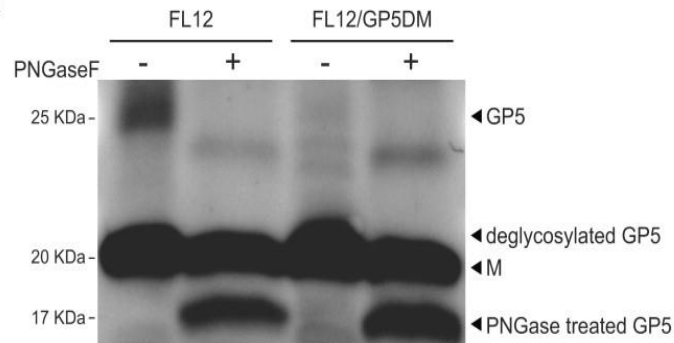

**Fig. S1. Immunofluorescence assay of rescued wt and mutant virus from reverse genetics and glycosylation analysis.** (A) Complete genomes of wt and mutant obtained from infectious clones of PRRSV were used to transfect MARC-145 cells. Rescued viruses were confirmed by immunofluorescence assay at different time points using the N protein of PRRSV specific monoclonal antibody. (B) Expression profiles of GP5 of PRRSV wt and mutant in MARC145 cells were investigated using Western blotting. The proteins of wt and mutant viruses were digested with PNGaseF (+) or undigested (-) and separated by 12% SDS-PAGE. Viral proteins were detected using porcine serum containing high level of PRRSV specific antibody.

Jung-Ah Lee , Byungjoon Kwon , Fernando A. Osorio , Asit K. Pattnaik , Nak-Hyung Lee , Sang-Won Lee , Seung-Yong ...

**Protective humoral immune response induced by an inactivated porcine reproductive and respiratory syndrome virus expressing the hypo-glycosylated glycoprotein 5**

Vaccine, Volume 32, Issue 29, 2014, 3617 - 3622

<http://dx.doi.org/10.1016/j.vaccine.2014.04.083>
